# Supplementary material for: Evaluation of metal-based antimicrobial compounds for the treatment of bacterial pathogens
Source: PubMed Central journal article supplement — J Med Microbiol. 2021 May 7;70(5):001363. doi: 10.1099/jmm.0.001363 (PMC8289199; doi:10.1099/jmm.0.001363), 2021-05-07
Supplement: jmm-70-1363-s001.pdf [file jmm-70-1363-s001.pdf]

## Supplementary information

**Table S1.** Other metals with antibacterial potential.

| Metal            | Observed Activity                                                                                                                                                                                                                                                                                                                                                                                                                                | References |
|------------------|--------------------------------------------------------------------------------------------------------------------------------------------------------------------------------------------------------------------------------------------------------------------------------------------------------------------------------------------------------------------------------------------------------------------------------------------------|------------|
| <b>Bismuth</b>   | <ul style="list-style-type: none"> <li>• Bi(III) exhibits low toxicity against humans and potent toxicity against bacteria.</li> <li>• <i>H. pylori</i> appears particularly susceptible to three bismuth drugs: ranitidine bismuth citrate (Pylorid), colloidal bismuth subcitrate (CBS, De-Nol), and bismuth subsalicylate (Pepto-Bismol)</li> <li>• Bi(III) and CBS identified as metallo-<math>\beta</math> lactamase inhibitors.</li> </ul> | [26, 193]  |
| <b>Iridium</b>   | <ul style="list-style-type: none"> <li>• Ir(III) complexes shown bacteriostatic activity</li> <li>• Good antimicrobial potential</li> <li>• High cost of element and high dosage required for antibacterial effect, thus not a primary resource</li> </ul>                                                                                                                                                                                       | [26]       |
| <b>Iron</b>      | <ul style="list-style-type: none"> <li>• Moderate antibacterial activity against the Gram-positive bacteria <i>S. aureus</i></li> <li>• Inactive against Gram-negative <i>E. coli</i> and <i>P. aeruginosa</i></li> <li>• More studies required to determine <i>in vitro</i> and <i>in vivo</i> efficacy and toxicity</li> </ul>                                                                                                                 | [194]      |
| <b>Palladium</b> | <ul style="list-style-type: none"> <li>• Antibacterial activity observed against <i>E. faecalis</i>, <i>S. aureus</i>, <i>E. coli</i>, <i>K. pneumonia</i>, and <i>P. aeruginosa</i></li> <li>• Proposed antibacterial activity caused by binding with DNA and protein</li> <li>• More studies required to determine <i>in vitro</i> and <i>in vivo</i> efficacy and toxicity</li> </ul>                                                         | [195, 196] |
| <b>Platinum</b>  | <ul style="list-style-type: none"> <li>• Bactericidal activity, inducing bacterial filamentation and lysis in lysogenic bacteria</li> <li>• Proposed antibacterial activity caused by interaction with DNA</li> </ul>                                                                                                                                                                                                                            | [197]      |
| <b>Rhenium</b>   | <ul style="list-style-type: none"> <li>• Antimicrobial activity not well researched</li> <li>• Promising activity against Gram-positive bacteria in particular</li> <li>• Lack of <i>in vivo</i> data, requires further research</li> </ul>                                                                                                                                                                                                      | [26]       |

| Metal            | Observed Activity                                                                                                                                                                                                                                                                                                                                                                                                                                                                                                                                                                                                                                                                                                                | References |
|------------------|----------------------------------------------------------------------------------------------------------------------------------------------------------------------------------------------------------------------------------------------------------------------------------------------------------------------------------------------------------------------------------------------------------------------------------------------------------------------------------------------------------------------------------------------------------------------------------------------------------------------------------------------------------------------------------------------------------------------------------|------------|
| <b>Rhodium</b>   | <ul style="list-style-type: none"> <li>• Bacteriostatic effect against the Gram-positive bacterium <i>S. pneumoniae</i> without significant cytotoxic side-effect on host cell <i>in vitro</i></li> <li>• Affects bacterial metal ion binding and metabolic pathways</li> <li>• More studies required to determine <i>in vitro</i> and <i>in vivo</i> efficacy and toxicity</li> </ul>                                                                                                                                                                                                                                                                                                                                           | [198]      |
| <b>Ruthenium</b> | <ul style="list-style-type: none"> <li>• Bactericidal activity</li> <li>• Labile ruthenium complexes bind nucleic acids through ligand exchange reactions</li> <li>• Inert ruthenium compounds, generally bearing one or more polypyridyl ligand(s), can bind DNA and RNA through intercalation</li> <li>• Remarkable antimicrobial activity shown <i>in vitro</i></li> <li>• Rapid clearance following IV administration reduces efficacy of compounds administered <i>in vivo</i>, likely better for topical administration</li> <li>• Lower propensity to induce resistance in <i>Streptococcus pyogenes</i> than penicillin</li> <li>• Further efficacy experiments required to determine <i>in vivo</i> efficacy</li> </ul> | [26]       |
| <b>Tellurium</b> | <ul style="list-style-type: none"> <li>• Antibacterial activity demonstrated against <i>E. coli</i>, <i>E. cloacae</i>, and <i>P. aeruginosa</i></li> <li>• Te ions taken up by bacteria as if amino acids, replacing sulfur atom to form Tellurium-cysteine and Tellurium-methionine</li> <li>• More studies required to determine <i>in vitro</i> and <i>in vivo</i> efficacy and toxicity</li> </ul>                                                                                                                                                                                                                                                                                                                          | [199-201]  |

**Table S2.** MIC values of auranofin analogues **(11)** to **(16)** tested against a series of Gram-negative and Gram-positive bacterial strains ( $\mu\text{M}$ ).

|             | Gram-negative       |                      |                   |                      |                | Gram-Positive    |                   |
|-------------|---------------------|----------------------|-------------------|----------------------|----------------|------------------|-------------------|
|             | <i>A. baumannii</i> | <i>P. Aeruginosa</i> | <i>E. cloacae</i> | <i>K. pneumoniae</i> | <i>E. Coli</i> | <i>S. aureus</i> | <i>E. faecium</i> |
| <b>(11)</b> | 24                  | 189                  | 47                | 189                  | 12             | 0.04-0.09        | 0.09              |
| <b>(12)</b> | 15-29               | 464                  | 116               | 464                  | 4-7            | 0.02             | 0.05-0.1          |
| <b>(13)</b> | 4-17                | >547                 | 4-9               | 34                   | 9              | 0.3-0.5          | 0.3-0.5           |
| <b>(14)</b> | 9-19                | >547                 | 4                 | 34                   | 9              | 0.3              | 0.3-0.5           |
| <b>(15)</b> | 8-16                | >503                 | 8-16              | 31                   | 8-31           | 0.5              | 0.2-0.5           |
| <b>(16)</b> | 3-6                 | 23-91                | 3                 | 11                   | 1-6            | 0.3              | 0.3               |

## References

193. **Nazari P, Dowlatabadi-Bazaz R, Mofid MR, Pourmand MR, Daryani NE et al.** The Antimicrobial Effects and Metabolomic Footprinting of Carboxyl-Capped Bismuth Nanoparticles Against *Helicobacter pylori*. *Applied Biochemistry and Biotechnology* 2014;172(2):570-579.
194. **Patra M, Gasser G, Wenzel M, Merz K, Bandow JE et al.** Synthesis and Biological Evaluation of Ferrocene-Containing Bioorganometallics Inspired by the Antibiotic Platensimycin Lead Structure. *Organometallics* 2010;29(19):4312-4319.
195. **Kalaivani P, Prabhakaran R, Ramachandran E, Dallemer F, Paramaguru G et al.** Influence of terminal substitution on structural, DNA, Protein binding, anticancer and antibacterial activities of palladium(ii) complexes containing 3-methoxy salicylaldehyde-4(N) substituted thiosemicarbazones. *Dalton Transactions*, 10.1039/C1DT11838B 2012;41(8):2486-2499.
196. **Kalaivani P, Prabhakaran R, Dallemer F, Poornima P, Vaishnavi E et al.** DNA, protein binding, cytotoxicity, cellular uptake and antibacterial activities of new palladium(ii) complexes of thiosemicarbazone ligands: effects of substitution on biological activity. *Metallomics*, 10.1039/C1MT00144B 2012;4(1):101-113.
197. **Johnstone TC, Alexander SM, Lin W, Lippard SJ.** Effects of Monofunctional Platinum Agents on Bacterial Growth: A Retrospective Study. *Journal of the American Chemical Society* 2014;136(1):116-118.
198. **Yang X-Y, Xu J-Y, Meng M, Li N, Liu C-Y et al.** Dirhodium (II) complex interferes with iron-transport system to exert antibacterial action against *Streptococcus pneumoniae*. *Journal of Proteomics* 2019;194:160-167.
199. **Kalechman Y, Shani A, Sotnik-Barkai I, Albeck M, Sredni B.** The Protective Role of Ammonium Trichloro(dioxoethylene-*O,O'*) tellurate in Combination with Several Cytotoxic Drugs Acting by Different Mechanisms of Action. *Cancer Research* 1993;53(24):5962-5969.
200. **Ramadan SE, Razak AA, Ragab AM, El-Meleigy M.** Incorporation of tellurium into amino acids and proteins in a tellurium-tolerant fungi. *Biological Trace Element Research* 1989;20(3):225.
201. **D'Arcy K, Doyle AP, Kavanagh K, Ronconi L, Fresch B et al.** Stability of antibacterial Te(IV) compounds: A combined experimental and computational study. *Journal of Inorganic Biochemistry* 2019;198:110719.
